# Supplementary material for: Spartin activates atrophin-1-interacting protein 4 (AIP4) E3 ubiquitin ligase and promotes ubiquitination of adipophilin on lipid droplets
Source: PubMed Central journal article supplement (PMC2887783; doi:10.1186/1741-7007-8-72), 2010-05-26

# Additional File2

## Figure 2

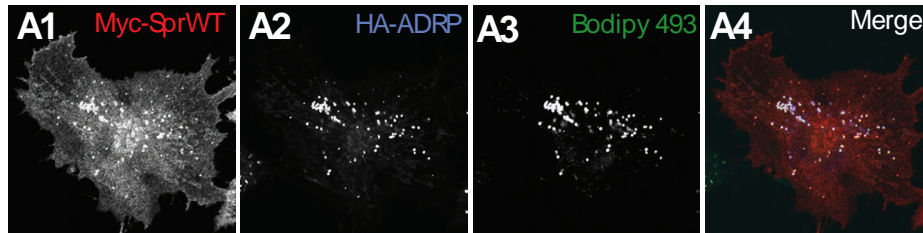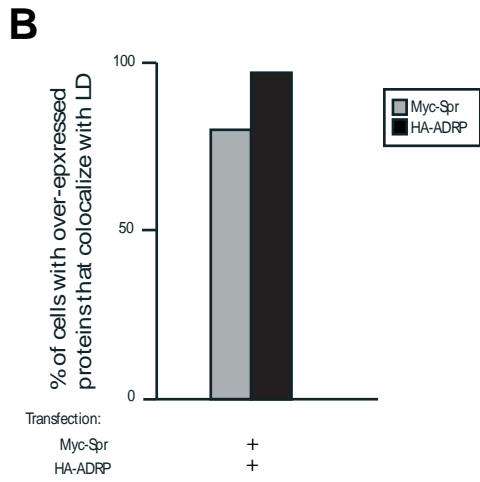

Supplement: 1741-7007-8-72-S2.pdf [file 1741-7007-8-72-S2.pdf]
